# Supplementary material for: PART1 facilitates tumorigenesis and inhibits ferroptosis by regulating the miR-490-3p/SLC7A11 axis in hepatocellular carcinoma
Source: publisher site journal article supplement (doi:10.18632/aging.206009), 2024-07-05
Supplement: Supplementary file [file aging-v16-206009-supplementary-material-SD1.pdf]

## SUPPLEMENTARY FIGURE

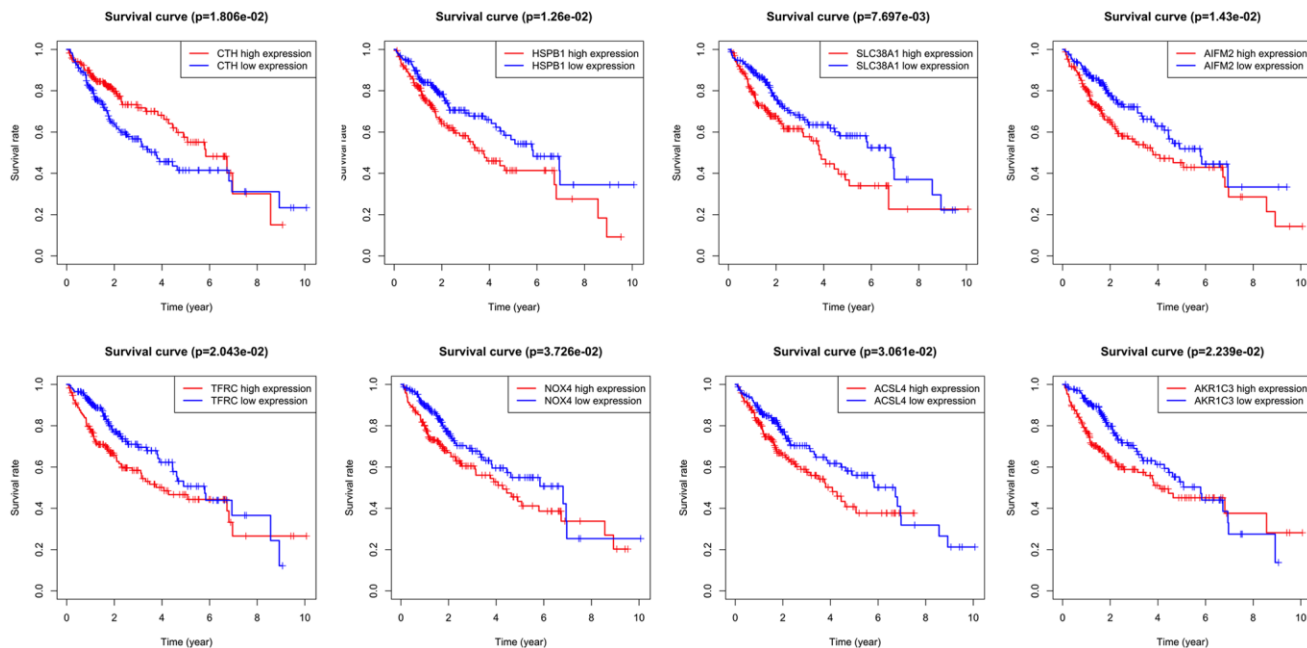

Supplementary Figure 1. Kaplan-Meier survival analysis for the differentially expressed prognosis-related ferroptosis-associated genes in patients with HCC.
