# Supplementary material for: PART1 facilitates tumorigenesis and inhibits ferroptosis by regulating the miR-490-3p/SLC7A11 axis in hepatocellular carcinoma
Source: publisher site journal article supplement (doi:10.18632/aging.206009), 2024-07-05
Supplement: Supplementary file [file aging-v16i14-206009-supplementary-material-SD2.pdf]

## SUPPLEMENTARY TABLE

**Supplementary Table 1. The sequences of siRNAs and miRNA mimics.**

| <b>Item</b>                     | <b>Sense (5'–3') (including overhangs)</b> | <b>Antisense (5'–3') (including overhangs)</b> |
|---------------------------------|--------------------------------------------|------------------------------------------------|
| siRNA-PART1-1                   | GGUGUGAAAUAAGGUUAATT                       | UUAACCUUUAUUUCACACCTT                          |
| siRNA-PART1-2                   | GAAAGUUGUUGAAUUAATT                        | UUUAUAUUCAACAACUUUCTT                          |
| siRNA-PART1-3                   | GAGUUGACUUUGUGUUAATT                       | UAUAAACACAAAGUCAACUCTT                         |
| siRNA-SLC7A11-1                 | GGAAGAGAUUCAAGUAUATT                       | UAAUACUUGAAUCUCUUCCTT                          |
| siRNA-SLC7A11-2                 | GGAGUUAUGUUUAAGUAAATT                      | UUUACUAAAACAUAACUCCTT                          |
| siRNA-SLC7A11-3                 | GAGUUAGUUUGGUUAUAAATT                      | UUUAAUACCAAACUAACUCTT                          |
| miR-490-3p mimics               | CAACCUGGAGGACUCCAUGCUG                     | GCAUGGAGUCCUCCAGGUUGUU                         |
| <b>The sequences of primers</b> |                                            |                                                |
| <b>Item</b>                     | <b>F</b>                                   | <b>R</b>                                       |
| PART1                           | CAGCCATCTCACCAGACACC                       | CAGCCTGAATCCTCAATAATCC                         |
| SLC7A11                         | TCTCAAAGGAGGTTACCTGC                       | AGACTCCCCTCAGTAAAGTGAC                         |
| miR-490-3p                      | CAACCTGGAGGACTCCAT                         | TCCAGTTTTTTTTTTTTTTTCAGCA                      |
